# Supplementary material for: The Complex Network of Cytokines and Chemokines in Pediatric Patients with Long-Standing Type 1 Diabetes
Source: MDPI journal article supplement (doi:10.3390/ijms25031565), 2024-01-26
Supplement: s1 [file s1]

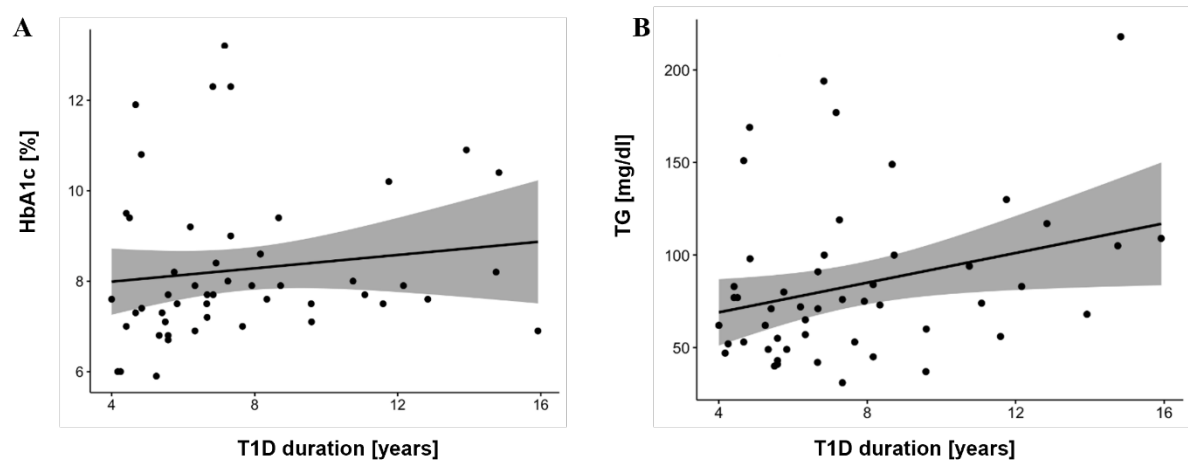

**Figures S1A-B.** The correlation between the T1D duration [years] and HbA1c level [%], and between the T1D duration [years] and TG level [mg/dl]. Correlations between measured parameters were analyzed using Spearman's rank correlation.

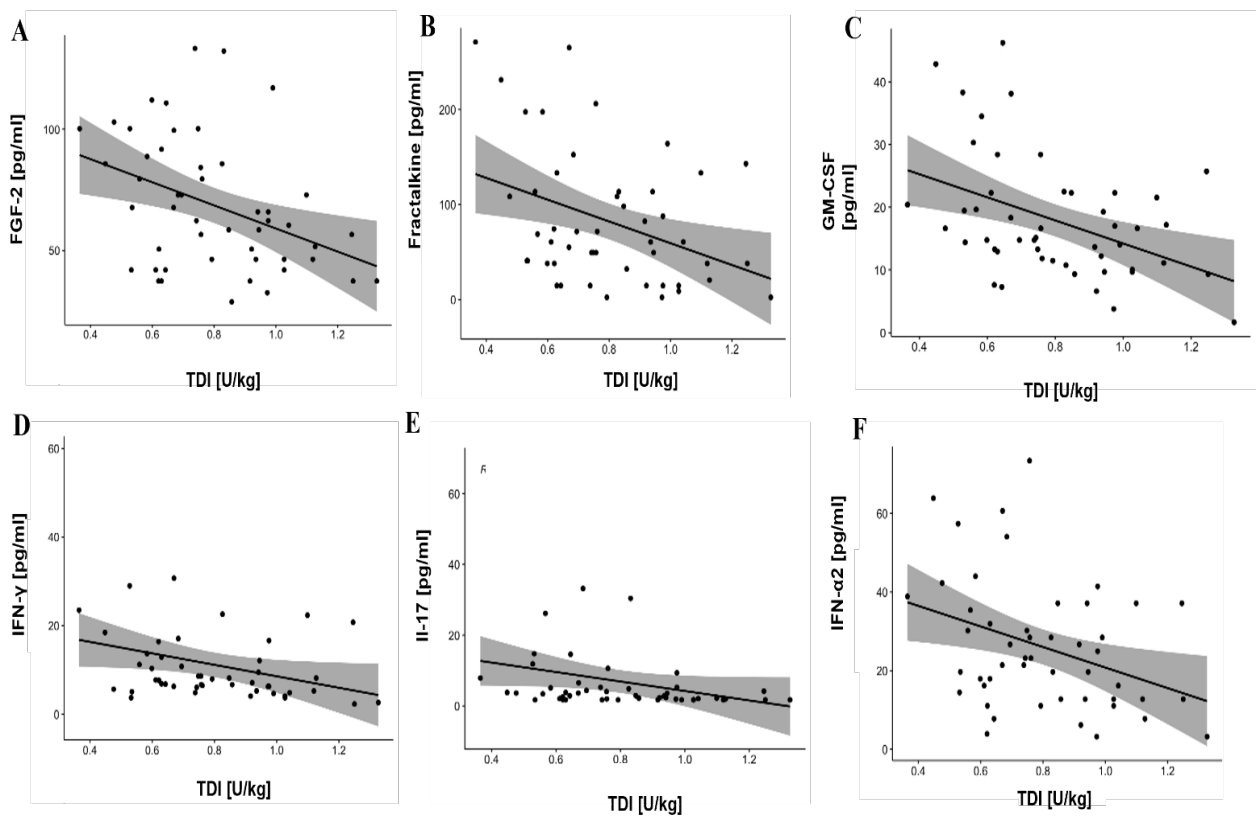

**Figures S2A-F.** Statistical significant correlations between biomarkers concentrations [pg/ml], and TDI [U/kg] in T1D patients. Logarithmic transformation of TDI was required.

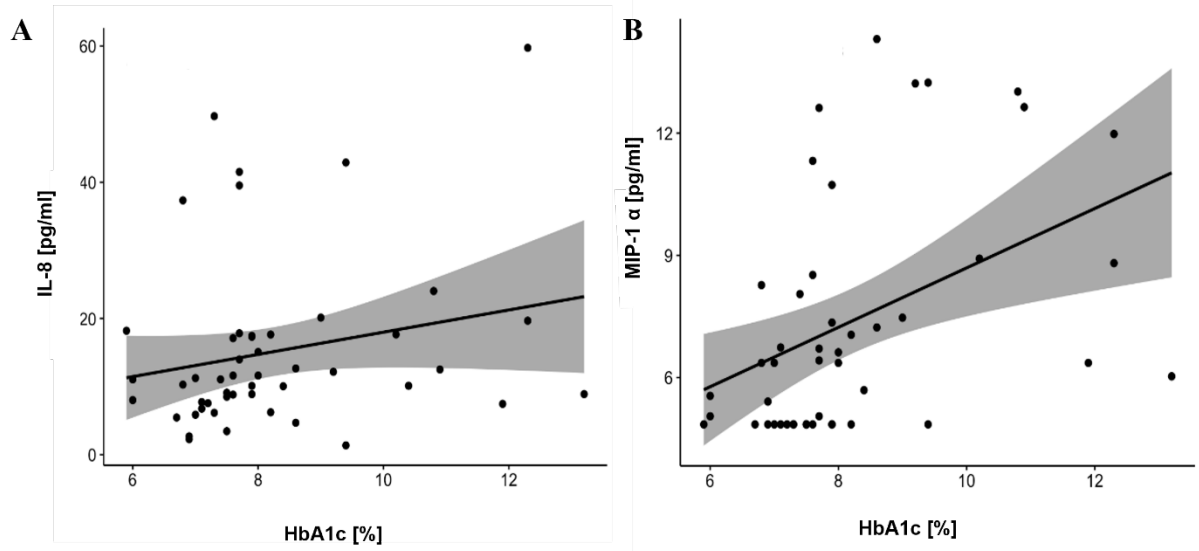

**Figures S3A-B.** Statistical significant correlations between cytokines concentrations [pg/ml] and HbA1c level [%] in T1D patients. Correlations between measured parameters were analyzed using Spearman's rank correlation.

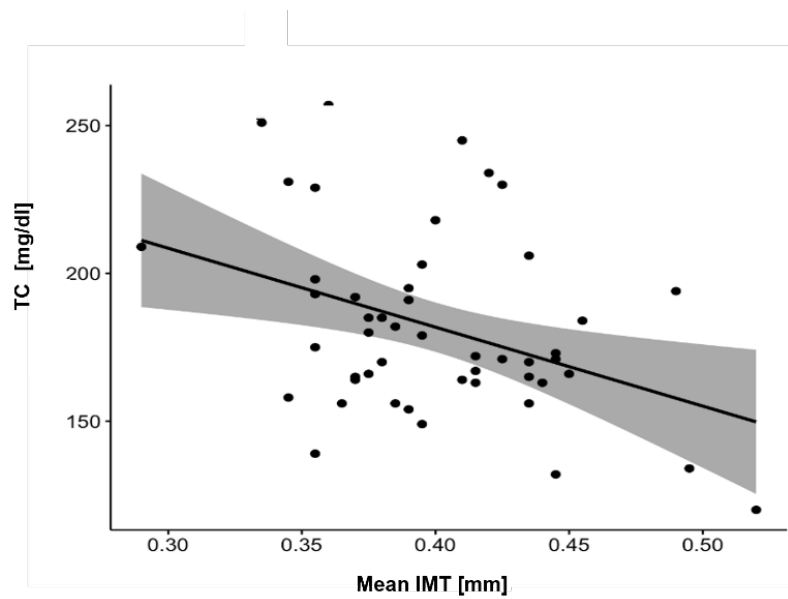

**Figure S4.** Statistical significant correlations between TC level [mg/dl] and mean carotid IMT [mm]. Correlations between measured parameters were analyzed using Spearman's rank correlation.

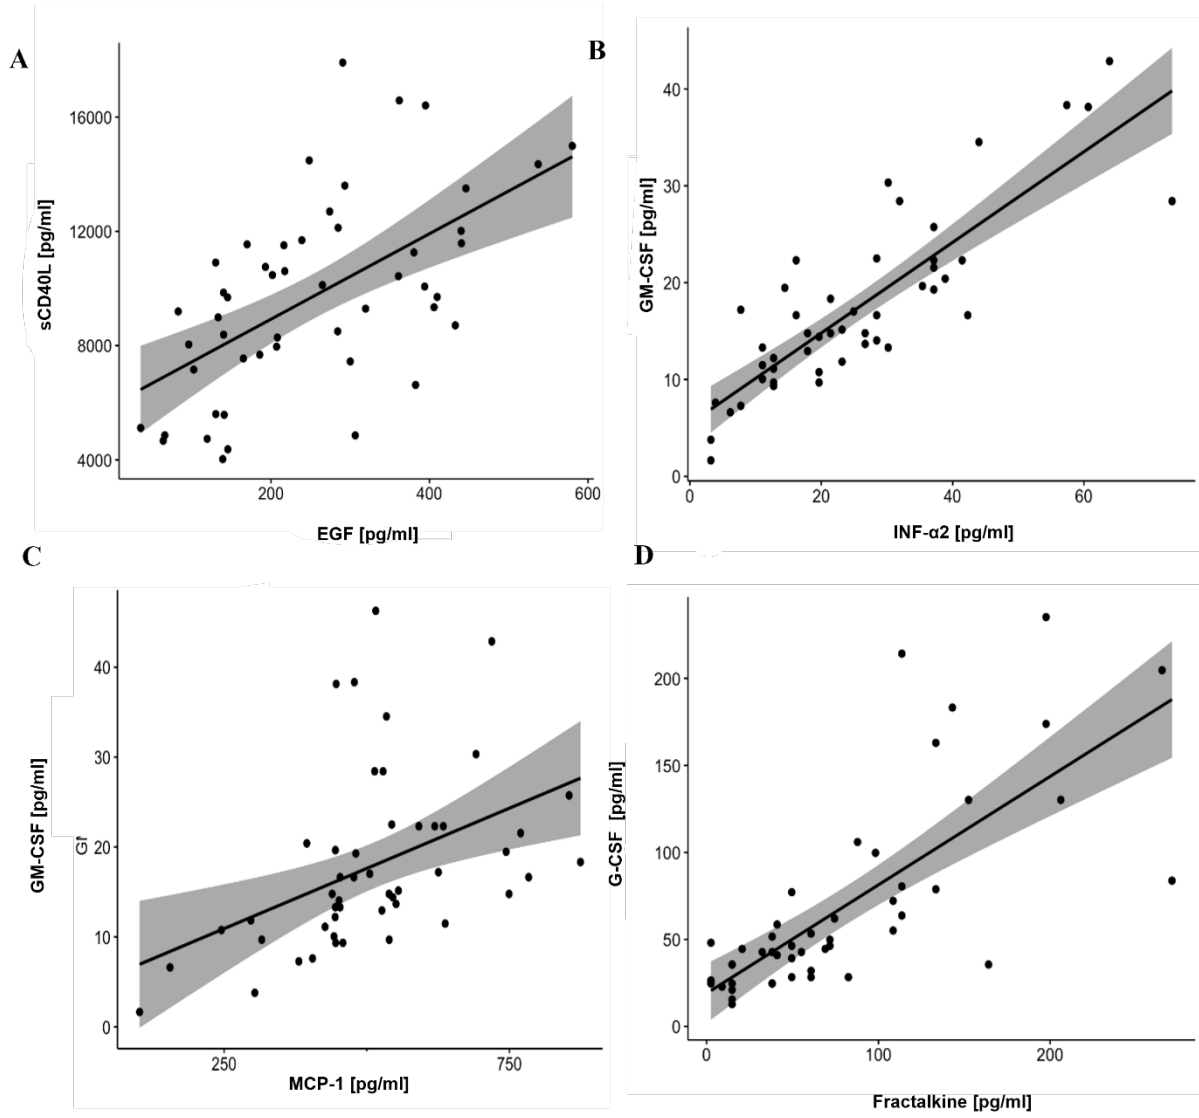

**Figure S5A-D.** Statistical significant correlations between biomarkers concentrations [pg/ml]. Correlations between measured parameters were analyzed using Spearman's rank correlation.

**Table S1.** Cytokines concentrations in T1D patients with HbA1c  $\geq 8\%$  and  $<8\%$  in comparison to the HD group. Data are presented as mean values  $\pm$  SD. F values and q values (adjusted p-values) were reported in the case of the ANOVA test.

| Cytokines concentrations (pg/ml)   | T1D $\geq 8\%$ (n=20) | T1D $<8\%$ (n=32)   | HD (n=39)           | p-value  | F          | qT1D $\geq 8\%$ /T1D $<8\%$ | qT1D $\geq 8\%$ /HD | qT1D $<8\%$ /HD |
|------------------------------------|-----------------------|---------------------|---------------------|----------|------------|-----------------------------|---------------------|-----------------|
| EGF                                | 283.7 $\pm$ 147.7     | 233.3 $\pm$ 117.6   | 162.6 $\pm$ 83.9    | $<0.001$ | 8.271      | 0.122                       | 0.001               | 0.015           |
| Eotaxin                            | 152.7 $\pm$ 83.0      | 115.5 $\pm$ 44.2    | 102.2 $\pm$ 33.0    | 0.003    | 6.307      | <b>0.020</b>                | 0.002               | 0.279           |
| MDC                                | 1042.5 $\pm$ 272.9    | 944.7 $\pm$ 225.2   | 871.2 $\pm$ 238.9   | 0.043    | 3.261      | 0.206                       | 0.039               | 0.206           |
| MCP-1                              | 563.2 $\pm$ 122.8     | 477.4 $\pm$ 170.7   | 450.5 $\pm$ 141.4   | 0.029    | 3.695      | 0.075                       | 0.025               | 0.451           |
| sCD40L                             | 11129.3 $\pm$ 3905.0  | 8897.3 $\pm$ 2694.6 | 7645.8 $\pm$ 2638.8 | $<0.001$ | 8.839      | <b>0.016</b>                | $<0.001$            | 0.080           |
| TNF- $\alpha$                      | 27.6 $\pm$ 9.1        | 24.2 $\pm$ 7.3      | 20.4 $\pm$ 6.0      | 0.002    | 6.868      | 0.101                       | 0.002               | 0.045           |
| * Cytokines concentrations (pg/ml) | T1D $\geq 8\%$ (n=20) | T1D $<8\%$ (n=32)   | HD (n=39)           | p-value  | Chi-square | qT1D $\geq 8\%$ /T1D $<8\%$ | qT1D $\geq 8\%$ /HD | qT1D $<8\%$ /HD |
| MIP-1 $\alpha$                     | 7.5 (6.5)             | 5.1 (2.0)           | 5.1 (3.3)           | 0.011    | 11.285     | <b>0.005</b>                | 0.006               | 0.878           |
| TGF- $\alpha$                      | 7.2 (5.0)             | 6.0 (3.8)           | 3.7 (2.9)           | $<0.001$ | 19.677     | 0.565                       | 0.001               | $<0.001$        |

\* Data that failed to show normal distribution even following the log-transformation were analyzed using the Kruskal-Wallis test with post-hoc Wilcoxon test and are presented as medians with corresponding interquartile ranges (IQR).
